# Supplementary material
Source: publisher site journal article supplement (https://www.dovepress.com/article/433629)
Supplement: Supplementary file 1 [file get_supplementary_file.php]

**Supplementary Figure 1 (Figure S1).** Analysis of published journals and cited literatures. A. Co-occurrence map of published journals; B. Co-occurrence map of cited literatures.


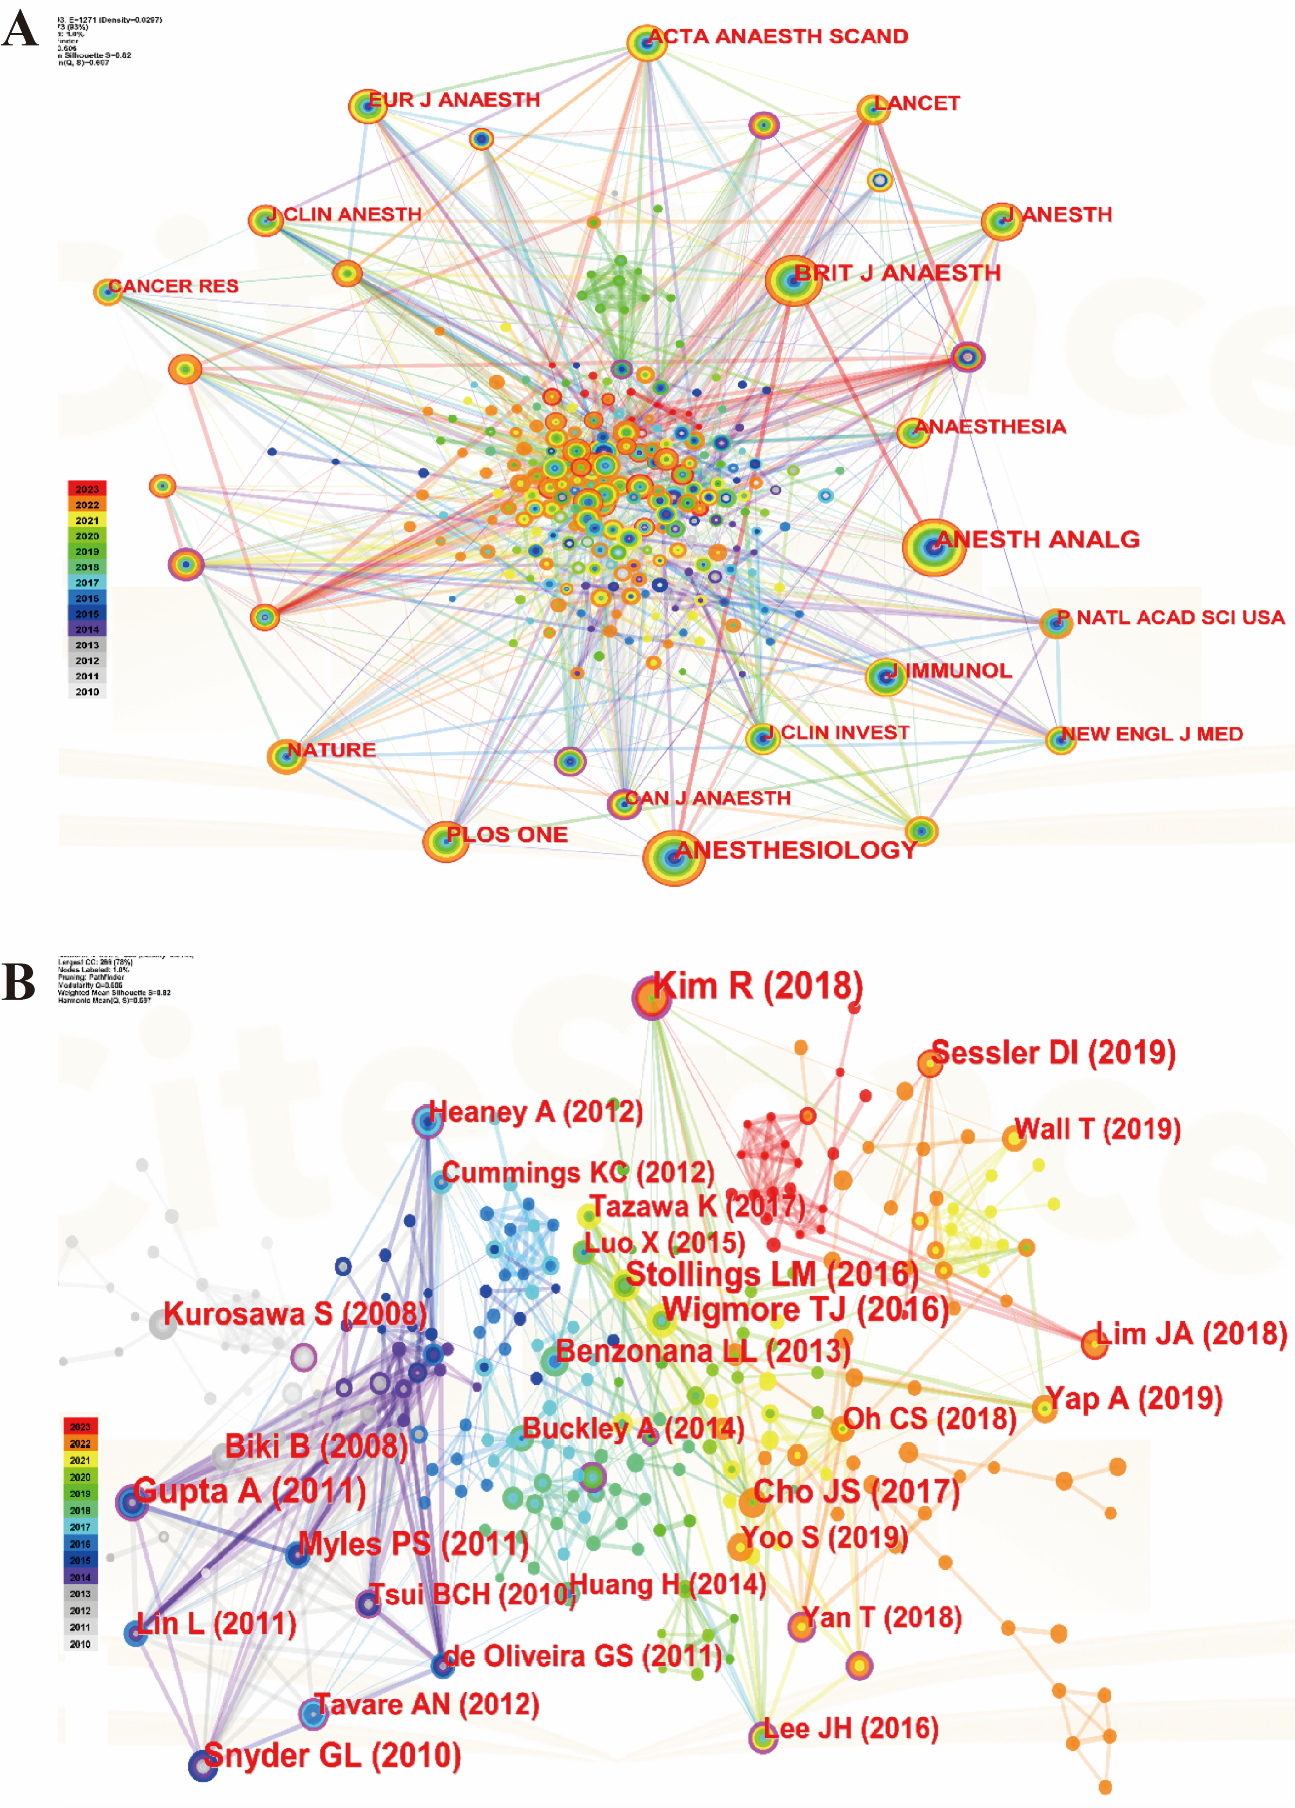


**Supplementary Table 1 (Table S1).** Top 10 institutions in terms of publication/centrality

| No. | Publication | Institution | Centrality | Institution |
| --- | --- | --- | --- | --- |
| 1 | 12 | Harvard University | 0.01 | Institut National de la Sante et de la Recherche Medicale (Inserm) |
| 2 | 10 | Boston Children's Hospital | 0.01 | State University System of Florida |
| 3 | 9 | Harvard Medical School | 0 | Harvard University |
| 4 | 7 | Institut National de la Sante et de la Recherche Medicale (Inserm) | 0 | Boston Children's Hospital |
| 5 | 6 | Fudan University | 0 | Harvard Medical School |
| 6 | 6 | Cleveland Clinic Foundation | 0 | Fudan University |
| 7 | 5 | Shanghai Jiao Tong University | 0 | Cleveland Clinic Foundation |
| 8 | 5 | Assistance Publique Hopitaux Paris (APHP) | 0 | Shanghai Jiao Tong University |
| 9 | 5 | Mater Misericordiae University Hospital | 0 | Assistance Publique Hopitaux Paris (APHP) |
| 10 | 4 | Shanghai Ocean University | 0 | Mater Misericordiae University Hospital |

**Supplementary Table 2 (Table S2).** Top 10 authors in terms of publication /centrality

| No. | publication | Author | Centrality | Author |
| --- | --- | --- | --- | --- |
| 1 | 5 | Buggy, Donal J | 0 | Buggy, Donal J |
| 2 | 5 | Yuki, Koichi | 0 | Yuki, Koichi |
| 3 | 4 | Cata, Juan P | 0 | Cata, Juan P |
| 4 | 3 | Inada, Takefumi | 0 | Inada, Takefumi |
| 5 | 3 | Kubo, Kozue | 0 | Kubo, Kozue |
| 6 | 3 | Huang, Yi-Hsuan | 0 | Huang, Yi-Hsuan |
| 7 | 2 | Zhang, Man | 0 | Zhang, Man |
| 8 | 2 | Chung, Yeonseok | 0 | Chung, Yeonseok |
| 9 | 2 | Wang, Jiansong | 0 | Wang, Jiansong |
| 10 | 2 | Kritsepi-konstantinou, Maria | 0 | Kritsepi-konstantinou, Maria |

**Supplementary Table 3 (Table S3).** Top 10 most frequently cited journals

| Journal | Citation | Country/region | IF（2021） | JCR |
| --- | --- | --- | --- | --- |
| Anesthesiology | 206 | United States | 8.986 | Q2 |
| Anesth Analg | 202 | United States | 6.627 | Q2 |
| Brit J Anaesth | 179 | England | 11.719 | Q2 |
| PLOS One | 112 | United States | 3.752 | Q3 |
| J Anesth | 98 | United States | 2.931 | Q4 |
| Acta Anaesth Scand | 96 | Denmark | 2.274 | Q4 |
| J Immunol | 92 | United States | 5.426 | Q2 |
| Lancet | 84 | England | 202.731 | Q1 |
| Anaesthesia | 82 | England | 12.893 | Q2 |
| Nature | 78 | England | 69.504 | Q1 |

**Supplementary Table 4 (Table S4).** Top 10 keywords for frequency/centrality

| No. | Frequency | Keyword | Centrality | Keyword |
| --- | --- | --- | --- | --- |
| 1 | 48 | surgery | 0.22 | activation |
| 2 | 41 | general anesthesia | 0.18 | general anesthesia |
| 3 | 37 | breast cancer | 0.13 | surgery |
| 4 | 30 | local anesthetics | 0.13 | immune function |
| 5 | 27 | immune function | 0.13 | analgesia |
| 6 | 23 | activation | 0.11 | breast cancer |
| 7 | 22 | in vitro | 0.1 | local anesthetics |
| 8 | 21 | killer cell activity | 0.1 | killer cell activity |
| 9 | 21 | cells | 0.1 | anesthesia |
| 10 | 21 | anesthetic technique | 0.1 | anesthetics |

**Supplementary Table 5 (Table S5).** Keywords clustering

| Cluster ID | Cluster label | Size | | Silhouette | Year | Label (LLR) |
| --- | --- | --- | --- | --- | --- | --- |
| #0 | breast cancer | | 53 | 0.633 | 2015 | breast cancer; anaesthetic technique; cancer recurrence; oncological surgery; anesthetic strategies |
| #1 | continuing search | | 46 | 0.764 | 2017 | continuing search; addiction vaccine; inhibitory effect; cell differentiation; vaginal inoculation |
| #2 | urinary inflammatory biomarkers neopterin | | 40 | 0.844 | 2015 | urinary inflammatory biomarkers neopterin; knee replacement surgery; ischemia-reperfusion injury; renal function; aryl hydrocarbon receptor |
| #3 | tumor microenvironment | | 27 | 0.791 | 2017 | tumor microenvironment; intravenous anesthetic drug-propofol; malignant tumor; biological characteristics; narrative literature review |
| #4 | infectious disease | | 26 | 0.931 | 2018 | infectious disease; perioperative adverse event; 2-adrenoceptor agonist; systematic review; cardiovascular event |
| #5 | mitochondrial neutrophil | | 25 | 0.864 | 2013 | mitochondrial neutrophil; apoptosis function; lidocaine hydrochloride; reactive oxygen species production; cd11b expression |
| #6 | followed-up risk | | 24 | 0.856 | 2015 | followed-up risk; herpes zoster; possible effect; anaesthetic management; caesarean deliveries |
| #7 | gilthead seabream | | 19 | 0.908 | 2017 | gilthead seabream; gnotobiotic sea bass larvae; glucocorticoid level; probiotic candidate; glucose level |
| #8 | major spinal surgery | | 17 | 0.863 | 2014 | major spinal surgery; intraoperative infusion; neutrophil function1; antinociceptive effect; dexmedetomidine modulate |
| #9 | conceptual view | | 14 | 0.831 | 2018 | conceptual view; acute reflectory hyperinflammation; stellate ganglion block; other diseases; neural therapy |
| #10 | castration | | 11 | 0.990 | 2013 | castration; inhalation anaesthetic; genotoxic effect; equine lymphocyte; vaccine development |
